# Supplementary material for: Detection of tick-borne bacteria and babesia with zoonotic potential in Argas (Carios) vespertilionis (Latreille, 1802) ticks from British bats
Source: PubMed Central journal article supplement (PMC5789838; doi:10.1038/s41598-018-20138-1), 2018-01-30
Supplement: 41598_2018_20138_MOESM1_ESM.pdf [file 41598_2018_20138_MOESM1_ESM.pdf]

1 **Detection of tick-borne bacteria and babesia with zoonotic potential in**  
2 ***Argas (Carios) vespertilionis* (Latreille, 1802) ticks from British bats**  
3  
4 Jizhou Lv, Maria del Mar Fernández de Marco, Hooman Goharriz, L. Paul Phipps, Lorraine M.  
5 McElhinney, Luis M. Hernández-Triana, Shaoqiang Wu, Xiangmei Lin, Anthony R. Fooks,  
6 Nicholas Johnson  
7

8 **Supplimentary Table S1: Ectoparasites specimens collected from bats submitted**  
9 **from across the UK between 2007 and 2013.**

10

| Sample number (year) | Hosts                            | County          | <i>Argas vespertilionis</i> (ticks) |                                  | No. of collected unidentified Non-ticks parasites |
|----------------------|----------------------------------|-----------------|-------------------------------------|----------------------------------|---------------------------------------------------|
|                      |                                  |                 | <i>No. of collected specimens</i>   | <i>No. of screened specimens</i> |                                                   |
| 96 (2007)            | <i>Myotis daubentonii</i>        | Buckinghamshire | 6 larva                             | 4 larva                          |                                                   |
| 103 (2007)           | <i>Pipistrellus pipistrellus</i> | Suffolk         |                                     |                                  | 3 specimens                                       |
| 134 (2007)           | <i>Pipistrellus pipistrellus</i> | Staffordshire   |                                     |                                  | 2 specimens                                       |
| 163 (2007)           | <i>Pipistrellus pipistrellus</i> | Buckinghamshire | 14 larva                            | 6 larva                          |                                                   |
| 167 (2007)           | <i>Myotis mystacinus</i>         | Derbyshire      |                                     |                                  | 7 specimens                                       |
| 171 (2007)           | <i>Pipistrellus pipistrellus</i> | Surrey          | 5 larva                             | 3 larva                          |                                                   |
| 172 (2007)           | <i>Plecotus auritus</i>          | Buckinghamshire | 22 larva                            | 5 larva                          |                                                   |
| 306 (2007)           | <i>Nyctalus noctula</i>          | Derbyshire      |                                     |                                  | 9 specimens                                       |
| 384 (2007)           | <i>Pipistrellus pipistrellus</i> | Warwickshire    |                                     |                                  | 19 specimens                                      |
| 388 (2007)           | <i>Pipistrellus pipistrellus</i> | Yorkshire       |                                     |                                  | 10 specimens                                      |
| 408 (2007)           | <i>Pipistrellus pipistrellus</i> | Hertfordshire   |                                     |                                  | 3 specimens                                       |
| 418 (2007)           | <i>Myotis daubentonii</i>        | Lincolnshire    |                                     |                                  | 11 specimens                                      |
| 584 (2007)           | <i>Pipistrellus pipistrellus</i> | Yorkshire       |                                     |                                  | 8 specimens                                       |
| 685 (2007)           | <i>Pipistrellus pipistrellus</i> | Staffordshire   | 11 larva                            | 6 larva                          |                                                   |
| 862 (2007)           | <i>Pipistrellus pipistrellus</i> | Aberdeenshire   |                                     |                                  | 13 specimens                                      |
| 873 (2007)           | <i>Pipistrellus pipistrellus</i> | Shropshire      | 15 larva                            | 6 larva                          |                                                   |
| 952 (2007)           | <i>Pipistrellus pipistrellus</i> | Midlothian      |                                     |                                  | 21 specimens                                      |

|              |                                  |                 |          |         |              |
|--------------|----------------------------------|-----------------|----------|---------|--------------|
| 041 (2008)   | <i>Pipistrellus pipistrellus</i> | Buckinghamshire | 21 larva | 6 larva |              |
| 224 (2008)   | <i>Pipistrellus pipistrellus</i> | Monmouthshire   | 7 larva  | 6 larva |              |
| 260 (2008)   | <i>Pipistrellus pipistrellus</i> | Oxfordshire     | 29 larva | 6 larva |              |
| 262 (2008)   | <i>Pipistrellus pipistrellus</i> | Hertfordshire   | 12 larva | 6 larva |              |
| 300 (2008)   | <i>Pipistrellus pipistrellus</i> | Buckinghamshire | 14 larva | 8 larva |              |
| 312 (2008)   | <i>Pipistrellus pipistrellus</i> | Cambridgeshire  |          |         | 16 specimens |
| 383-A (2008) | <i>Pipistrellus pipistrellus</i> | Buckinghamshire | 22 larva | 6 larva |              |
| 383-B (2008) | <i>Pipistrellus pipistrellus</i> | Buckinghamshire |          |         | 4 specimens  |
| 551 (2008)   | <i>Pipistrellus pipistrellus</i> | Buckinghamshire | 15 larva | 6 larva |              |
| 552 (2008)   | <i>Pipistrellus pipistrellus</i> | Buckinghamshire | 6 larva  | 4 larva |              |
| 575 (2008)   | <i>Myotis nattereri</i>          | Shropshire      |          |         | 11 specimens |
| 585 (2008)   | <i>Pipistrellus pipistrellus</i> | Oxfordshire     | 12 larva | 6 larva |              |
| 702 (2008)   | <i>Pipistrellus pipistrellus</i> | Berkshire       | 30 larva | 4 larva |              |
| 722 (2008)   | <i>Pipistrellus pipistrellus</i> | Buckinghamshire | 17 larva | 6 larva |              |
| 922 (2008)   | <i>Myotis daubentonii</i>        | Ayrshire        |          |         | 9 specimens  |
| 1127 (2008)  | <i>Pipistrellus pipistrellus</i> | Cambridgeshire  | 12 larva | 6 larva |              |
| 070 (2009)   | <i>Pipistrellus pipistrellus</i> | Lincolnshire    |          |         | 3 specimens  |
| 147 (2009)   | <i>Myotis daubentonii</i>        | Ayrshire        |          |         | 10 specimens |
| 290 (2009)   | <i>Eptesicus serotinus</i>       | Somerset        |          |         | 2 specimens  |
| 292 (2009)   | <i>Pipistrellus pipistrellus</i> | Kent            |          |         | 7 specimens  |
| 570 (2009)   | <i>Myotis nattereri</i>          | Dunbarton       |          |         | 3 specimens  |
| 800 (2009)   | <i>Pipistrellus pipistrellus</i> | Kent            | 5 larva  | 4 larva |              |

|             |                                  |                 |         |         |              |
|-------------|----------------------------------|-----------------|---------|---------|--------------|
| 932 (2009)  | <i>Myotis daubentonii</i>        | Dorset          |         |         | 4 specimens  |
| 1046 (2009) | <i>Plecotus auritus</i>          | Buckinghamshire |         |         | 1 specimens  |
| 1091 (2009) | <i>Pipistrellus pipistrellus</i> | Sussex          |         |         | 1 specimens  |
| 013 (2010)  | <i>Plecotus auritus</i>          | Leicestershire  |         |         | 2 specimens  |
| 089 (2010)  | N/A                              | Lincolnshire    |         |         | 1 specimens  |
| 326 (2010)  | <i>Pipistrellus pipistrellus</i> | Lancashire      |         |         | 13 specimens |
| 417 (2010)  | <i>Pipistrellus pipistrellus</i> | Hertfordshire   | 1 larva | 1 larva |              |
| 428 (2010)  | <i>Myotis mystacinus</i>         | Glamorgan       |         |         | 3 specimens  |
| 530 (2010)  | <i>Pipistrellus pipistrellus</i> | Buckinghamshire | 7 larva | 5 larva |              |
| 979 (2010)  | <i>Myotis daubentonii</i>        | Surrey          |         |         | 5 specimens  |
| 978 (2010)  | <i>Myotis daubentonii</i>        | Surrey          |         |         | 2 specimens  |
| 2019 (2010) | <i>Myotis daubentonii</i>        | Warwickshire    |         |         | 3 specimens  |
| 1071 (2010) | <i>Pipistrellus pipistrellus</i> | Leicestershire  | 1 larva | 1 larva |              |
| 628 (2011)  | <i>Myotis mystacinus</i>         | Shropshire      |         |         | 2 specimens  |
| 866 (2011)  | <i>Pipistrellus pipistrellus</i> | Lincolnshire    |         |         | 2 specimens  |
| 886 (2011)  | <i>Plecotus auritus</i>          | Surrey          |         |         | 8 specimens  |
| 1059 (2011) | <i>Nyctalus noctula</i>          | Shropshire      |         |         | 1 specimens  |
| 1025 (2011) | <i>Pipistrellus pipistrellus</i> | Northumberland  | 1 larva | 1 larva |              |
| 04 (2012)   | <i>Rhinolophus hipposideros</i>  | Devon           |         |         | 8 specimens  |
| 115 (2012)  | <i>Rhinolophus hipposideros</i>  | Devon           |         |         | 13 specimens |
| 566 (2012)  | <i>Pipistrellus pipistrellus</i> | Yorkshire       | 8 larva | 6 larva |              |
| 45 (2013)   | <i>Pipistrellus pipistrellus</i> | Hertfordshire   | 2 larva | 1 larva |              |

|              |                         |          |           |           |               |
|--------------|-------------------------|----------|-----------|-----------|---------------|
| 378 (2013)   | <i>Plecotus auritus</i> | Somerset | 1 larva   | 1 larva   |               |
| Total number |                         |          | 296 larva | 120 larva | 142 specimens |

11

12

13 **Supplementary Table S2: Primers used to detect the pathogens in bat ticks**

14 **collected in UK.**

| Target                                      | Gene Target                  | Primer pairs                                                                                                                                                                                                          | Amplicon(bp) |
|---------------------------------------------|------------------------------|-----------------------------------------------------------------------------------------------------------------------------------------------------------------------------------------------------------------------|--------------|
| Arthropod species                           | CO1                          | HCO1490:<br>5'-GTTCAACAAATCATAAAGATATTGG-3'<br>LCO2198:<br>5'-TAAACTTCAGGGTGACCAAAAAATCA-3'                                                                                                                           | 675          |
| Arthropod species                           | 16SrRNA                      | 16S-1:<br>5'-CCACAGCAATTTAAAAAATCATTGAGCAG-3'<br>16S+1:<br>5'-CCGGTCTGAACTCAGATCAAGT-3'                                                                                                                               | 454          |
| Piroplasm spp.                              | 18S rRNA                     | PIROA:<br>5'-AATACCCAATCCTGACACAGGG-3'<br>PIROB:<br>5'-TTAAATACGAATGCCCCAAC-3'                                                                                                                                        | 426          |
| <i>Rickettsia</i> spp.                      | 17 kDa                       | 17K-5: 5'-GCTTTACAAAATTCTAAAAACCATATA-3'<br>17K-3: 5'-TGCTATCAATTCACAACCTTGCC-3'<br>17kD1: 5'-GCTCTTGCAACTTCTAT GTT-3'<br>17kD2: 5'-CATTGTTTCGTCAGGTTGGCG-3'<br>First round: 17K-5/17K-3<br>Second round: 17kD1/17kD2 | 434          |
| <i>Ehrlichia</i> /<br><i>Anaplasma</i> spp. | 16S rRNA                     | EHR 16SD: 5'-GGTACCYACAGAAGAAGTCC-3'<br>EBR3: 5'-TTGTAGTCGCCATTGTAGCAC-3'<br>EBR2: 5'-TGCTGACTTGACATCATCCC-3'<br>First round: EHR 16SD/ EBR3<br>Second round: EHR 16SD/ EBR2                                          | 925          |
| <i>Borrelia</i> spp.                        | Flagellin                    | F1a: 5'-GCAGTTCAATCAGGTAACGG-3'<br>F2a: 5'-AGGTTTTCAATAGCATACTC-3'                                                                                                                                                    | 565          |
| Issyk-kul virus                             | S SEGMENT                    | BUNV-F2: 5'-TGTGGGCAAGAGGmcttagatcctc-3'<br>BUNV-R1: 5'-AAGCATGCCAGCATAYTGAAGATG-3'<br>BUNV-R2: 5'-AACACTAGTTAAMAGCTACAGATG-3'<br>First round: BUNV-F2/BUNV-R1<br>Second round: BUNV-F2/BUNV-R2                       | 320          |
| <i>Coxiella burnetii</i>                    | Cb IS 1111 element           | CF: 5'-tatgtatccaccgtagccagtc-3'<br>CR: 5'-cccaacaacacctcctattc-3'                                                                                                                                                    | 687          |
| Flavivirus                                  | RNA-dependent RNA polymerase | PF1S: 5'-TGYRTBTAYAACATGATGGG-3'<br>PF2R-bis: 5'-GTGTCCCAICCNCGNCTRTC-3'<br>PF3S: 5'-ATHTGGT WYATGTGGYTDGG-3'<br>First round: PF1S / PF2R-bis<br>Second round: PF3S / PF2R-bis                                        | 197          |

15

16

17 **Supplementary Table S3: GenBank Accession numbers for sequences obtained**  
 18 **in this study.**

| <b>Species</b>              | <b>Sample codes</b> | <b>Target gene</b> | <b>Accession numbers</b> |
|-----------------------------|---------------------|--------------------|--------------------------|
| <i>Argas vespertilionis</i> | 702-H               | COI                | MF510173                 |
| <i>Argas vespertilionis</i> | 172-F               | COI                | MF510174                 |
| <i>Argas vespertilionis</i> | 702-H               | 16S rRNA           | MF510175                 |
| <i>Argas vespertilionis</i> | 172-F               | 16S rRNA           | MF510176                 |
| <i>Argas vespertilionis</i> | 383-1               | 16S rRNA           | MF510177                 |
| <i>Babesia venatorum</i>    | 378                 | 18S rRNA           | MF510178                 |
| <i>Babesia vesperuginis</i> | 041-5               | 18S rRNA           | MF510179                 |
| <i>Rickettsia spp.</i>      | 041-4               | 17 kDa             | MF510180                 |
| <i>Rickettsia spp.</i>      | 260-2               | 17 kDa             | MF510181                 |
| <i>Rickettsia spp.</i>      | 262-4               | 17 kDa             | MF510182                 |
| <i>Rickettsia spp.</i>      | 300-5               | 17 kDa             | MF510183                 |
| <i>Rickettsia spp.</i>      | 383-4               | 17 kDa             | MF510184                 |
| <i>Rickettsia spp.</i>      | 530-5               | 17 kDa             | MF510185                 |
| <i>Rickettsia spp.</i>      | 551-5               | 17 kDa             | MF510186                 |
| <i>Rickettsia spp.</i>      | 552-2               | 17 kDa             | MF510187                 |
| <i>Rickettsia spp.</i>      | 722-1               | 17 kDa             | MF510188                 |
| <i>Rickettsia spp.</i>      | 172-3               | 17 kDa             | MF510189                 |
| <i>Rickettsia spp.</i>      | 300-F               | 17 kDa             | MF510190                 |
| <i>Rickettsia spp.</i>      | 702-F               | 17 kDa             | MF510191                 |
| <i>Ehrlichia spp.</i>       | 702-F               | 16S rRNA           | MF510192                 |
| <i>Ehrlichia spp.</i>       | 566-3               | 16S rRNA           | MF510193                 |
| <i>Ehrlichia spp.</i>       | 1025                | 16S rRNA           | MF510194                 |

19
